# Supplementary material
Source: publisher figshare collection journal article supplement (https://karger.figshare.com/ndownloader/files/17220188)
Supplement: Supplementary file 1 [file 17220188]

**SUPPLEMENTARY MATERIAL 3**

Table

Heading: Sex, weight and body length of all individual Sahamalaza sportive lemurs, *Lepilemur sahamalaza*, that were radio-collared for this study. Fragments correspond to the two forest areas in Figure 1.

| **Year/**Month | **Fragment** | **ID** | **Sex** | **Weight (g)** | **Nose-Tail (cm)** |
| --- | --- | --- | --- | --- | --- |
| **2015** | "A" | 1 | M | 1010 | 53 |
| February |  | 2 | F | 820 | 54.8 |
|  |  | 3 | M | 750 | 54.4 |
| **2015** | "B" | 1 | F | 790 | 53 |
| September |  | 2 | F | 840 | 51 |
|  |  | 3 | F | 701 | 53 |
|  |  | 4 | M | 750 | 53 |
|  |  | 5 | F | 520 | 47.8 |
|  |  | 6 | F | 600 | 50.5 |
|  |  | 7 | F | 760 | 50.7 |
|  |  | 8 | M | 740 | 53.6 |
|  |  | 9 | F | 590 | 49.4 |
|  |  | 10 | M | 550 | 49.5 |
|  |  | 11 | M | 760 | 52.8 |
|  |  | 12 | M | 680 | 52 |
|  |  | 13 | F | 655 | 50 |
|  |  | 14 | M | 750 | 54 |
